# Supplementary material for: Polyamines containing naphthyl groups as pH-regulated molecular machines driven by light
Source: Royal Society of Chemistry journal article supplement (doi:10.1039/b104311k), 2001-01-01
Supplement: b104311k.doc [file b104311k.doc]

### **Supplementary Material**

- **Synthesis and characterisation data of the compounds**

## -**Table S1.** **Stepwise Protonation Constants for L1-L5 determined at 298.0 0.1 K**

## **in NaCl 0.15 mol dm-3.**

**- Figure S1.** **Distribution diagrams of the systems L1-H+, L2-H+, L3-H+, L4-H+ and**

**L5-H+.**

**- Figure S2.** **Fluorescence emission spectra of other members of this family (L5 and**

**L6).**

**- Figure S3.** **Fluorescence decays and pulse instrumental response, with exc = 281**

**nm, for:**

**A- L5 at pH=2.7.**

**B- and C- L1 at pH=3.2 and 6.1 respectively. Shown as insert are the decay**

**times (ins) and the normalized pre-exponential factors (ai). For judging**

**the quality of the fit, chi-squares (2), autocorrelation functions (A.C.)**

**and weigthed residuals (W.R.) are also shown.**

**Synthesis**

The synthesis of receptors L1-L4 has been accomplished following the procedure reported in ref [10].

*1,7-Bis(1-Naphthylmethyl) -1,4,7-Triazadecane Trihydrochloride (L1·3HCl).* Diethylenetetraamine (0.88 g, 8.6 mmol) and naphthalene-1-carbaldehyde (2.59 g, 16.6 mmol) were stirred for 72 h. in 75 ml of EtOH. Sodium borohydride (0.66 g, 17.2 mmol) was then added and the resulting solution stirred overnight. The ethanol was removed at reduced pressure. The resulting residue was treated with water and the difunctionalised amine repeatedly extracted with dichloromethane (3x30 mL). The organic phase was dried with anhydrous sodium sulfate and the solvent evaporated to yield the free amine, which was dissolved in ethanol and precipitated as its hydrochloride salt. 86 % yield, mp 201-204 ºC; solvent D2O, J in Hz. H (ppm): 3.29 (t, J=6 Hz, 4H), 3.40 (t, J=6 Hz, 4H), 4.65 (s, 4H), 7.43-7.58 (m, 8H), 7.89-7.98 (m, 6H). C (ppm):43.6, 43.8, 48.7, 122.7, 125.9, 126.3, 127.1, 127.8, 129.5, 129.9,131.1, 131.1, 131.7, 133.9. Anal. Calcd. For C26H32Cl3N3.: C 63.35 H 6.54 N 8.52. Found: C 63.7 H 6.1 N 8.6.

*1,10-Bis(1-Naphthylmethyl) -1,4,7,10-tetraazadecane Tetrahydrochloride ( L2·4HCl).*

75 % yield, mp 228-231 ºC; solvent D2O, J in Hz. H (ppm): 3.34 (s, 4H), 3.37 (t, J=6 Hz, 4H), 3.46 (t, J=6 Hz, 4H), 4.65 (s, 4H), 7.44-7.58 (m, 8H), 7.87-7.99 (m, 6H); C (ppm): 43.2, 43.9, 43.8, 48.9, 122.8, 125.9, 126,2, 127.1, 127.9, 129.5, 131.1, 131.1, 133.9. Anal. Calcd. For C28H38Cl4N4: C 58.75 H 6.69 N 9.79. Found: C 58.9 H 6.7 N 9.8.

1,13-Bis(1-Naphthylmethyl) -1,4,7,10,13,-pentaazadecane Pentahydrochloride (L3·5HCl).56 % yield, mp 215-218 ºC; solvent D2O, J in Hz. H (ppm): 3.38-3.56 (m, 16H), 4.70 (s, 4H), 7.48-7.66 (m, 8H), 7.94-8.06 (m, 6H); C (ppm): 42.8, 43.5, 43.6, 44.5, 48.6, 122.4, 125.6, 125.6, 125.9, 126.7, 127.5, 129.1, 129.6, 130.8, 133.6. Anal. Calcd. for C30H44Cl5N5: C, 55.57; H, 6.80; N, 10.74. Found: C, 55.8; H, 6.8; N, 10.9.

*1, 16- Bis(1-Naphthylmethyl) –1, 4, 7, 10, 13, 16- Hexaazadecane Hexahydrochloride (L4. 6HCl).* 49 % yield; mp 170-175 ºC; solvent D2O, J in Hz. H (ppm): 3.37-3.2 (m, 20H), 4.45 (s, 4H), 7.42-7.26 (m, 8H), 7.82-7.73 (m, 6H); C (ppm): 43.6, 44.2, 44.4, 45.4, 49.4, 123.3, 126.3, 126.5, 127.5, 128.3, 129.8, 130.4, 131.5, 134.3. Anal. Calcd. For C32H50Cl6N6: C 52.54 H 6.9 N 11.5. Found: C 52.0 H 7.0 N 11.2.

The synthesis of receptor L5 has been accomplished following the procedure reported in reference: Eur. J. Inorg. Chem. **2001**, 405-412.

*N2[{2-(naphtylmethyl)-amino}ethyl] ethane-1,2-diamine Trihydrochloride (L5·3HCl).* A five-fold excess of triethylenetetraamine (3.10 g, 30 mmol) with naphthalene-1-carbaldehyde (0.94 g, 6 mmol) were stirred for 48 h in 75 mL of EtOH. Sodium borohydride (1 g, 26.0 mmol) was added and the mixture was stirred at room temperature for 24 h. The solvent was removed at reduced pressure, the resulting residue treated with water and the functionalised amine repeatedly extracted with dichloromethane (330 mL). The organic phase was washed with water and dried over anhydrous sodium sulfate and the solvent evaporated to yield the free amine, which was dissolved in ethanol and precipitated as its hydrochloride salt. 98 % yield; mp 198-201 ºC; solvent D2O, J in Hz. H (ppm): 3.29 (t, J= 6, 2H), 3.36(t, J=6, 2H), 3.45(t, J=4, 2H), 3.49(J=4, 2H), 4.7 (s, 2H), 7.3-7.6 (m, 4H), 7.89-7.99(m, 3H); C (ppm): 35.5, 43.0, 43.7, 44.8, 48.9, 122.7, 125.84, 126.2, 127.0, 127.8, 129.4, 129.9, 130.5, 131.0, 133.8. Anal. Calcd. For C15H24N3Cl3: C 51.08, H 6.86, N 11.91. Found: C 51.2, H 7.1, N 12.0.

**Table S1.** Stepwise Protonation Constants for L1-L5 determined at 298.0 0.1 K in NaCl 0.15 mol dm-3.

| **Reactiona** | **L1** | **L2** | **L3** | **L4c** | **L5** |
| --- | --- | --- | --- | --- | --- |
| H + L = HL | 8.38(2)b | 9.12(2) | 9.32(1) | 10.04(4) | 9.72(1) |
| H + HL = H2L | 7.81(1) | 8.22(2) | 8.58(1) | 8.94(3) | 8.21(1) |
| H + H2L = H3L | 3.81(3) | 6.01(3) | 7.39(2) | 8.29(3) | 3.94(2) |
| H + H3L = H4L | - | 3.18(3) | 4.77(3) | 6.82(4) | - |
| H + H4L = H5L | - | - | 2.68(3) | 4.58(4) | - |
| H + H5L = H6L | - | - | - | 2.23(1) | - |
| Log  | 19.99 | 26.53 | 32.74 | 40.90 | 21.87 |

a Charges omitted for clarity.

b Numbers in parentheses are standard deviations in the last significant figure.

c Taken from ref [10].

**Figure S1.** Distribution diagrams of the systems L1-H+, L2-H+, L3-H+, L4-H+ and L5-H+.

**Figure S2**. Fluorescence emission spectra of other members of this family

# L6: Analogue receptor containing a reinforcing piperazine ring-

**Figure S3.** Fluorescence decays and pulse instrumental response, with exc = 281 nm, for:

1. L5 at pH=2.7.
2. B- and C- L1 at pH=3.2 and 6.1 respectively. Shown as insert are the decay times (ins) and the normalized pre-exponential factors (ai). For judging the quality of the fit, chi-squares (2), autocorrelation functions (A.C.) and weigthed residuals (W.R.) are also shown.

# L1

# pH=3.2

# L1

# pH=6.1

# L5

# pH=2.7

Table- Fluorescence decay times and pre-exponential factors for compounds L2, L5 and L6 as a function of the pH.

| Compound | pH | em | 1/ns | 2/ns | 3/ns | A1 | A2 | A3 | 2 |
| --- | --- | --- | --- | --- | --- | --- | --- | --- | --- |
| L5 | 2.7 | 330 | 10.7 |  | 31 | 0.10 |  | 0.90 | 1.14 |
| L6 | 2 | 330 |  |  | 29.5 |  |  | 1 | 1.00 |
| L1 | 3.2  4.6  6.1 | 315  410  315  418  315  410 | 3,4  3,8  4 | 15,8  16,2  15,4 | 31  36 | 0,37  -0.53  0,67  -0.70  0,73  -0.61 | 0,14  0.962  0,28  0.98  0,27  1.00 | 0,49  0.038  0,05  0.012  -  - | 1.20  1.11  1.34  1.32  0.90  1.07 |

In the previous table in the case of compound L1, the three decay times are related to:

(2) the fraction of excited monomer (1- in scheme 2) decaying and giving rise to the excimer,

(3) the decay time of the excited ( in scheme 2) free monomer species, i.e., not giving rise to the excimer species

and,

(1), the decay time of the excimer.
